# Supplementary material for: The Impact of Genetically Proxied AMPK Activation, the Target of Metformin, on Functional Outcome Following Ischemic Stroke
Source: PubMed Central journal article supplement — J Stroke. 2023 May 30;25(2):266–71. doi: 10.5853/jos.2022.03230 (PMC10250876; doi:10.5853/jos.2022.03230), 2023-05-30
Supplement: jos-2022-03230-Supplementary-Table-2.pdf [file jos-2022-03230-Supplementary-Table-2.pdf]

**Supplementary Table 1.** Forty-four AMPK variants associated with HbA1c in the MAGIC, restricted to participants of European descent

| SNP        | EA | NEA | Beta (%) | SE     | $P_{\text{MAGIC}}$ | $P_{\text{UK Biobank}}$ |
|------------|----|-----|----------|--------|--------------------|-------------------------|
| rs10230736 | G  | A   | -0.0110  | 0.0038 | 4.44E-03           | 4.13E-04                |
| rs10259821 | A  | G   | -0.0037  | 0.0019 | 4.71E-02           | 1.20E-03                |
| rs10492081 | A  | G   | -0.0071  | 0.0024 | 2.87E-03           | 9.20E-21                |
| rs1050187  | C  | T   | -0.0042  | 0.0019 | 2.42E-02           | 1.71E-03                |
| rs10783277 | C  | T   | -0.0045  | 0.0019 | 1.58E-02           | 4.35E-05                |
| rs10875764 | C  | T   | -0.0077  | 0.0038 | 4.45E-02           | 1.32E-13                |
| rs10875801 | C  | T   | -0.0089  | 0.0023 | 9.35E-05           | 5.95E-30                |
| rs10875814 | G  | A   | -0.0051  | 0.0024 | 3.22E-02           | 1.34E-09                |
| rs10875843 | A  | G   | -0.0093  | 0.0045 | 3.67E-02           | 4.79E-08                |
| rs11168355 | G  | A   | -0.0055  | 0.0022 | 1.14E-02           | 2.63E-43                |
| rs11168359 | A  | G   | -0.0150  | 0.0032 | 1.61E-06           | 6.94E-91                |
| rs11168547 | T  | C   | -0.0079  | 0.0026 | 2.28E-03           | 1.06E-26                |
| rs11168643 | A  | G   | -0.0180  | 0.0061 | 2.89E-03           | 3.84E-08                |
| rs11239944 | A  | G   | -0.0180  | 0.0061 | 3.05E-03           | 1.88E-04                |
| rs11884246 | A  | C   | -0.0033  | 0.0017 | 4.64E-02           | 2.61E-02                |
| rs12297820 | A  | G   | -0.0170  | 0.0029 | 1.26E-08           | 1.09E-43                |
| rs12322783 | A  | G   | -0.0045  | 0.0023 | 4.82E-02           | 1.80E-08                |
| rs12582586 | T  | C   | -0.0050  | 0.0024 | 3.58E-02           | 1.92E-04                |
| rs12582811 | G  | T   | -0.0089  | 0.0033 | 7.23E-03           | 1.96E-06                |
| rs12830014 | G  | A   | -0.0074  | 0.0037 | 4.71E-02           | 8.62E-04                |
| rs1365964  | G  | A   | -0.0057  | 0.0029 | 4.93E-02           | 6.91E-03                |
| rs1489107  | A  | G   | -0.0140  | 0.0058 | 1.73E-02           | 2.16E-22                |
| rs1563636  | C  | T   | -0.0057  | 0.0025 | 2.18E-02           | 1.94E-03                |
| rs1635527  | C  | G   | -0.0038  | 0.0019 | 4.15E-02           | 4.35E-36                |
| rs16858808 | A  | G   | -0.0250  | 0.0120 | 3.22E-02           | 2.36E-03                |
| rs17197593 | T  | C   | -0.0140  | 0.0062 | 2.23E-02           | 5.50E-05                |
| rs17572109 | A  | G   | -0.0055  | 0.0020 | 5.18E-03           | 1.54E-05                |
| rs17614932 | A  | C   | -0.0120  | 0.0051 | 1.45E-02           | 2.70E-11                |
| rs17834622 | A  | G   | -0.0064  | 0.0019 | 5.95E-04           | 1.10E-17                |
| rs1808593  | T  | G   | -0.0049  | 0.0024 | 3.96E-02           | 3.83E-03                |
| rs1859443  | G  | A   | -0.0058  | 0.0025 | 1.96E-02           | 6.27E-13                |
| rs1859444  | C  | T   | -0.0048  | 0.0024 | 4.39E-02           | 1.42E-22                |
| rs2059409  | T  | C   | -0.0110  | 0.0047 | 2.17E-02           | 1.16E-02                |
| rs2732480  | A  | C   | -0.0120  | 0.0020 | 2.00E-09           | 1.07E-142               |
| rs2932091  | A  | C   | -0.0043  | 0.0021 | 3.79E-02           | 1.25E-03                |
| rs3816560  | C  | T   | -0.0040  | 0.0019 | 3.19E-02           | 2.07E-05                |
| rs4760702  | A  | T   | -0.0110  | 0.0048 | 1.98E-02           | 1.16E-09                |
| rs6726126  | A  | G   | -0.0038  | 0.0018 | 3.09E-02           | 3.38E-07                |
| rs7134565  | C  | T   | -0.0035  | 0.0018 | 4.68E-02           | 3.79E-37                |
| rs7596500  | G  | T   | -0.0160  | 0.0074 | 3.16E-02           | 8.87E-03                |
| rs7780461  | T  | C   | -0.0063  | 0.0032 | 4.97E-02           | 1.16E-02                |
| rs7806203  | C  | T   | -0.0039  | 0.0020 | 4.74E-02           | 6.75E-03                |
| rs7959684  | A  | G   | -0.0050  | 0.0021 | 1.58E-02           | 1.30E-50                |
| rs7975821  | A  | G   | -0.0041  | 0.0021 | 4.77E-02           | 2.81E-07                |

AMPK, AMP-activated protein kinase; MAGIC, Meta-Analyses of Glucose and Insulin-Related Traits Consortium; SNP, single nucleotide polymorphism; EA, effect allele; NEA, non-effect allele; SE, standard error.

**Supplementary Table 2.** Ninety-nine variants associated with HbA1c in the MAGIC, restricted to participants of European descent

| SNP         | EA | NEA | Beta (%) | SE     | $P$       |
|-------------|----|-----|----------|--------|-----------|
| rs10151436  | A  | T   | 0.0130   | 0.0021 | 3.85E-11  |
| rs10169706  | T  | C   | 0.0260   | 0.0046 | 1.48E-08  |
| rs10231021  | A  | T   | 0.0089   | 0.0013 | 8.69E-14  |
| rs10405535  | A  | G   | 0.0122   | 0.0016 | 6.47E-14  |
| rs10419234  | T  | C   | -0.0224  | 0.0038 | 1.47E-09  |
| rs10774624  | A  | G   | 0.0093   | 0.0013 | 4.17E-14  |
| rs10811661  | T  | C   | 0.0128   | 0.0017 | 1.74E-14  |
| rs10830963  | C  | G   | -0.0197  | 0.0015 | 1.54E-36  |
| rs10998752  | A  | G   | 0.0125   | 0.0017 | 1.32E-14  |
| rs11039154  | T  | C   | -0.0087  | 0.0014 | 3.11E-09  |
| rs11224314  | A  | G   | -0.0152  | 0.0022 | 1.61E-13  |
| rs11248914  | T  | C   | 0.0114   | 0.0014 | 1.42E-14  |
| rs11257655  | T  | C   | 0.0110   | 0.0016 | 1.91E-13  |
| rs112578089 | A  | G   | -0.0360  | 0.0061 | 2.18E-11  |
| rs112601576 | T  | C   | 0.0089   | 0.0016 | 2.85E-08  |
| rs11558471  | A  | G   | 0.0151   | 0.0014 | 3.38E-25  |
| rs11643024  | A  | G   | 0.0084   | 0.0015 | 7.98E-10  |
| rs11656775  | A  | G   | 0.0070   | 0.0014 | 2.50E-08  |
| rs11719201  | T  | C   | -0.0129  | 0.0015 | 2.43E-18  |
| rs117233107 | A  | G   | -0.0470  | 0.0072 | 8.45E-11  |
| rs1175549   | A  | C   | 0.0098   | 0.0015 | 7.13E-13  |
| rs12491937  | A  | G   | 0.0090   | 0.0013 | 1.42E-13  |
| rs12612492  | T  | C   | 0.0188   | 0.0019 | 1.88E-26  |
| rs1278769   | A  | G   | -0.0091  | 0.0015 | 5.52E-12  |
| rs13089972  | A  | T   | 0.0111   | 0.0014 | 1.87E-15  |
| rs13134327  | A  | G   | 0.0144   | 0.0014 | 2.81E-26  |
| rs13234131  | A  | G   | -0.0113  | 0.0020 | 2.06E-09  |
| rs13389076  | A  | G   | 0.0332   | 0.0038 | 3.04E-18  |
| rs13419763  | T  | C   | 0.0080   | 0.0014 | 5.48E-09  |
| rs1367173   | T  | C   | -0.0152  | 0.0020 | 1.66E-14  |
| rs138374952 | A  | G   | -0.0251  | 0.0045 | 3.32E-08  |
| rs138917529 | A  | T   | 0.0377   | 0.0057 | 9.50E-11  |
| rs145353824 | A  | C   | -0.0381  | 0.0068 | 2.36E-09  |
| rs1535464   | A  | G   | -0.0086  | 0.0017 | 1.11E-08  |
| rs16926246  | T  | C   | -0.0727  | 0.0021 | 1.02E-268 |
| rs17037289  | A  | G   | -0.0089  | 0.0015 | 2.40E-09  |
| rs174559    | A  | G   | -0.0106  | 0.0014 | 3.31E-13  |
| rs17533945  | T  | C   | -0.0128  | 0.0014 | 1.62E-23  |
| rs1799945   | C  | G   | 0.0245   | 0.0018 | 3.32E-47  |
| rs1800562   | A  | G   | -0.0383  | 0.0027 | 2.33E-50  |
| rs192471087 | C  | G   | 0.0107   | 0.0019 | 1.37E-10  |
| rs1948759   | A  | NEA | -0.0097  | 0.0017 | 2.44E-08  |
| rs2273475   | A  | G   | -0.0128  | 0.0023 | 1.99E-09  |
| rs2375278   | A  | G   | 0.0112   | 0.0017 | 1.05E-11  |
| rs247833    | A  | G   | 0.0085   | 0.0017 | 2.85E-08  |
| rs267738    | T  | G   | 0.0109   | 0.0016 | 1.14E-11  |

Supplementary Table 2. Continued

| SNP        | EA | NEA | Beta (%) | SE     | P         |
|------------|----|-----|----------|--------|-----------|
| rs2748427  | A  | G   | -0.0307  | 0.0022 | 9.82E-49  |
| rs28671200 | T  | G   | 0.0086   | 0.0017 | 1.56E-08  |
| rs2908277  | A  | G   | 0.0166   | 0.0020 | 1.29E-18  |
| rs2954021  | A  | G   | -0.0070  | 0.0012 | 1.92E-10  |
| rs2971670  | T  | C   | 0.0316   | 0.0017 | 5.10E-88  |
| rs340882   | C  | G   | -0.0084  | 0.0013 | 1.48E-10  |
| rs34664882 | A  | G   | -0.0485  | 0.0040 | 4.82E-37  |
| rs360140   | A  | C   | -0.0084  | 0.0013 | 9.62E-13  |
| rs3778321  | A  | G   | -0.0106  | 0.0016 | 4.18E-11  |
| rs3829109  | A  | G   | -0.0086  | 0.0015 | 2.68E-08  |
| rs3842753  | T  | G   | 0.0075   | 0.0016 | 3.93E-08  |
| rs4076213  | A  | G   | -0.0127  | 0.0016 | 3.54E-16  |
| rs452306   | T  | C   | -0.0098  | 0.0014 | 5.51E-13  |
| rs453922   | T  | C   | -0.0126  | 0.0021 | 1.36E-08  |
| rs4727979  | A  | C   | 0.0121   | 0.0024 | 4.61E-08  |
| rs4737009  | A  | G   | 0.0228   | 0.0015 | 8.29E-56  |
| rs4760682  | A  | C   | 0.0164   | 0.0018 | 3.20E-20  |
| rs4894769  | A  | T   | -0.0073  | 0.0013 | 3.61E-09  |
| rs4980325  | T  | G   | 0.0108   | 0.0014 | 4.70E-14  |
| rs560887   | T  | C   | -0.0307  | 0.0014 | 5.55E-122 |
| rs608793   | T  | C   | 0.0065   | 0.0013 | 4.55E-08  |
| rs61750929 | T  | C   | -0.0284  | 0.0029 | 9.49E-24  |
| rs62079722 | A  | C   | 0.0112   | 0.0018 | 1.91E-11  |
| rs62175726 | T  | C   | -0.0218  | 0.0036 | 1.29E-10  |
| rs6445541  | T  | G   | 0.0077   | 0.0014 | 1.14E-08  |
| rs651007   | T  | C   | 0.0108   | 0.0015 | 3.28E-15  |
| rs6804915  | A  | C   | -0.0108  | 0.0014 | 2.76E-16  |
| rs6877043  | T  | C   | 0.0085   | 0.0014 | 1.99E-10  |
| rs6931514  | A  | G   | -0.0102  | 0.0014 | 1.18E-13  |
| rs6980507  | A  | G   | 0.0109   | 0.0013 | 8.15E-20  |
| rs7042939  | A  | G   | 0.0102   | 0.0013 | 1.50E-15  |
| rs7190771  | A  | G   | 0.0085   | 0.0013 | 6.02E-11  |
| rs7198799  | T  | C   | 0.0083   | 0.0014 | 4.76E-09  |
| rs72864470 | T  | C   | 0.0105   | 0.0017 | 1.52E-09  |
| rs7323938  | T  | C   | -0.0098  | 0.0018 | 3.39E-10  |
| rs737092   | T  | C   | -0.0073  | 0.0013 | 7.57E-09  |
| rs7534795  | T  | C   | 0.0100   | 0.0016 | 2.13E-09  |
| rs7547793  | A  | C   | -0.0118  | 0.0021 | 6.61E-09  |
| rs76533333 | A  | G   | -0.0265  | 0.0025 | 2.81E-29  |
| rs76815645 | A  | G   | -0.0131  | 0.0022 | 3.40E-09  |
| rs7861647  | T  | C   | 0.0128   | 0.0016 | 4.50E-14  |
| rs7903146  | T  | C   | 0.0133   | 0.0014 | 1.04E-22  |
| rs7918272  | C  | G   | -0.0147  | 0.0015 | 8.23E-23  |
| rs8138197  | A  | G   | -0.0073  | 0.0014 | 3.54E-08  |
| rs837763   | T  | C   | 0.0176   | 0.0013 | 5.20E-38  |

Supplementary Table 2. Continued

| SNP       | EA | NEA | Beta (%) | SE     | P         |
|-----------|----|-----|----------|--------|-----------|
| rs855791  | A  | G   | 0.0188   | 0.0013 | 1.34E-56  |
| rs857725  | T  | G   | -0.0208  | 0.0014 | 5.43E-55  |
| rs9299503 | A  | G   | 0.0117   | 0.0023 | 1.27E-08  |
| rs9376090 | T  | C   | 0.0247   | 0.0014 | 1.90E-62  |
| rs9604472 | C  | G   | 0.0133   | 0.0023 | 1.79E-08  |
| rs9818758 | A  | G   | 0.0131   | 0.0017 | 1.49E-13  |
| rs9909940 | T  | C   | 0.0322   | 0.0014 | 1.43E-116 |
| rs9914988 | A  | G   | 0.0125   | 0.0016 | 4.66E-17  |

MAGIC, Meta-Analyses of Glucose and Insulin-Related Traits Consortium; SNP, single nucleotide polymorphism; EA, effect allele; NEA, non-effect allele; SE, standard error.

Supplementary Table 3. Associations of genetically proxied AMPK activation with functional outcome after ischemic stroke based on the 3-month GWAS results with adjustment for NIHSS

| Outcomes                                     | OR (95% CI)       | P     |
|----------------------------------------------|-------------------|-------|
| Sensitivity analysis (44 SNPs, $r^2 < 0.3$ ) |                   |       |
| mRS (3–6 vs. 0–2; adjusted NIHSS)            |                   |       |
| IVW (P for Cochran's Q=0.92)                 | 0.06 (0.01–0.76)  | 0.029 |
| MR-RAPS                                      | 0.04 (0.00–0.93)  | 0.045 |
| Weighted median                              | 0.08 (0.00–3.61)  | 0.196 |
| MR-Egger (P for intercept=0.80)              | 0.04 (0.00–5.29)  | 0.191 |
| Ordinal mRS (adjusted NIHSS)                 |                   |       |
| IVW (P for Cochran's Q=0.29)                 | 0.11 (0.02–0.69)  | 0.018 |
| MR-RAPS                                      | 0.10 (0.01–0.91)  | 0.041 |
| Weighted median                              | 0.07 (0.00–1.08)  | 0.057 |
| MR-Egger (P for intercept=0.73)              | 0.20 (0.00–9.62)  | 0.416 |
| Sensitivity analysis (25 SNPs, $r^2 < 0.1$ ) |                   |       |
| mRS (3–6 vs. 0–2; adjusted NIHSS)            |                   |       |
| IVW (P for Cochran's Q=0.76)                 | 0.06 (0.00–1.14)  | 0.061 |
| MR-RAPS                                      | 0.04 (0.00–1.42)  | 0.077 |
| Weighted median                              | 0.07 (0.00–6.81)  | 0.26  |
| MR-Egger (P for intercept=0.61)              | 0.01 (0.00–5.92)  | 0.167 |
| Ordinal mRS (adjusted NIHSS)                 |                   |       |
| IVW (P for Cochran's Q=0.40)                 | 0.10 (0.01–0.91)  | 0.041 |
| MR-RAPS                                      | 0.10 (0.01–1.43)  | 0.090 |
| Weighted median                              | 0.06 (0.00–1.48)  | 0.085 |
| MR-Egger (P for intercept=0.67)              | 0.24 (0.00–23.08) | 0.542 |

AMPK, AMP-activated protein kinase; GWAS, genome-wide association study; NIHSS, National Institutes of Health Stroke Scale; OR, odds ratio; CI, confidence interval; SNPs, single nucleotide polymorphisms; mRS, modified Rankin Scale score; IVW, inverse-variance weighted; MR-RAPS, Mendelian randomization-robust adjusted profile score.
