# Supplementary material for: The Impact of Genetically Proxied AMPK Activation, the Target of Metformin, on Functional Outcome Following Ischemic Stroke
Source: PubMed Central journal article supplement — J Stroke. 2023 May 30;25(2):266–71. doi: 10.5853/jos.2022.03230 (PMC10250876; doi:10.5853/jos.2022.03230), 2023-05-30
Supplement: jos-2022-03230-Supplementary-Table-3.pdf [file jos-2022-03230-Supplementary-Table-3.pdf]

Supplementary Table 2. Continued

| SNP        | EA | NEA | Beta (%) | SE     | P         |
|------------|----|-----|----------|--------|-----------|
| rs2748427  | A  | G   | -0.0307  | 0.0022 | 9.82E-49  |
| rs28671200 | T  | G   | 0.0086   | 0.0017 | 1.56E-08  |
| rs2908277  | A  | G   | 0.0166   | 0.0020 | 1.29E-18  |
| rs2954021  | A  | G   | -0.0070  | 0.0012 | 1.92E-10  |
| rs2971670  | T  | C   | 0.0316   | 0.0017 | 5.10E-88  |
| rs340882   | C  | G   | -0.0084  | 0.0013 | 1.48E-10  |
| rs34664882 | A  | G   | -0.0485  | 0.0040 | 4.82E-37  |
| rs360140   | A  | C   | -0.0084  | 0.0013 | 9.62E-13  |
| rs3778321  | A  | G   | -0.0106  | 0.0016 | 4.18E-11  |
| rs3829109  | A  | G   | -0.0086  | 0.0015 | 2.68E-08  |
| rs3842753  | T  | G   | 0.0075   | 0.0016 | 3.93E-08  |
| rs4076213  | A  | G   | -0.0127  | 0.0016 | 3.54E-16  |
| rs452306   | T  | C   | -0.0098  | 0.0014 | 5.51E-13  |
| rs453922   | T  | C   | -0.0126  | 0.0021 | 1.36E-08  |
| rs4727979  | A  | C   | 0.0121   | 0.0024 | 4.61E-08  |
| rs4737009  | A  | G   | 0.0228   | 0.0015 | 8.29E-56  |
| rs4760682  | A  | C   | 0.0164   | 0.0018 | 3.20E-20  |
| rs4894769  | A  | T   | -0.0073  | 0.0013 | 3.61E-09  |
| rs4980325  | T  | G   | 0.0108   | 0.0014 | 4.70E-14  |
| rs560887   | T  | C   | -0.0307  | 0.0014 | 5.55E-122 |
| rs608793   | T  | C   | 0.0065   | 0.0013 | 4.55E-08  |
| rs61750929 | T  | C   | -0.0284  | 0.0029 | 9.49E-24  |
| rs62079722 | A  | C   | 0.0112   | 0.0018 | 1.91E-11  |
| rs62175726 | T  | C   | -0.0218  | 0.0036 | 1.29E-10  |
| rs6445541  | T  | G   | 0.0077   | 0.0014 | 1.14E-08  |
| rs651007   | T  | C   | 0.0108   | 0.0015 | 3.28E-15  |
| rs6804915  | A  | C   | -0.0108  | 0.0014 | 2.76E-16  |
| rs6877043  | T  | C   | 0.0085   | 0.0014 | 1.99E-10  |
| rs6931514  | A  | G   | -0.0102  | 0.0014 | 1.18E-13  |
| rs6980507  | A  | G   | 0.0109   | 0.0013 | 8.15E-20  |
| rs7042939  | A  | G   | 0.0102   | 0.0013 | 1.50E-15  |
| rs7190771  | A  | G   | 0.0085   | 0.0013 | 6.02E-11  |
| rs7198799  | T  | C   | 0.0083   | 0.0014 | 4.76E-09  |
| rs72864470 | T  | C   | 0.0105   | 0.0017 | 1.52E-09  |
| rs7323938  | T  | C   | -0.0098  | 0.0018 | 3.39E-10  |
| rs737092   | T  | C   | -0.0073  | 0.0013 | 7.57E-09  |
| rs7534795  | T  | C   | 0.0100   | 0.0016 | 2.13E-09  |
| rs7547793  | A  | C   | -0.0118  | 0.0021 | 6.61E-09  |
| rs76533333 | A  | G   | -0.0265  | 0.0025 | 2.81E-29  |
| rs76815645 | A  | G   | -0.0131  | 0.0022 | 3.40E-09  |
| rs7861647  | T  | C   | 0.0128   | 0.0016 | 4.50E-14  |
| rs7903146  | T  | C   | 0.0133   | 0.0014 | 1.04E-22  |
| rs7918272  | C  | G   | -0.0147  | 0.0015 | 8.23E-23  |
| rs8138197  | A  | G   | -0.0073  | 0.0014 | 3.54E-08  |
| rs837763   | T  | C   | 0.0176   | 0.0013 | 5.20E-38  |

Supplementary Table 2. Continued

| SNP       | EA | NEA | Beta (%) | SE     | P         |
|-----------|----|-----|----------|--------|-----------|
| rs855791  | A  | G   | 0.0188   | 0.0013 | 1.34E-56  |
| rs857725  | T  | G   | -0.0208  | 0.0014 | 5.43E-55  |
| rs9299503 | A  | G   | 0.0117   | 0.0023 | 1.27E-08  |
| rs9376090 | T  | C   | 0.0247   | 0.0014 | 1.90E-62  |
| rs9604472 | C  | G   | 0.0133   | 0.0023 | 1.79E-08  |
| rs9818758 | A  | G   | 0.0131   | 0.0017 | 1.49E-13  |
| rs9909940 | T  | C   | 0.0322   | 0.0014 | 1.43E-116 |
| rs9914988 | A  | G   | 0.0125   | 0.0016 | 4.66E-17  |

MAGIC, Meta-Analyses of Glucose and Insulin-Related Traits Consortium; SNP, single nucleotide polymorphism; EA, effect allele; NEA, non-effect allele; SE, standard error.

Supplementary Table 3. Associations of genetically proxied AMPK activation with functional outcome after ischemic stroke based on the 3-month GWAS results with adjustment for NIHSS

| Outcomes                                     | OR (95% CI)       | P     |
|----------------------------------------------|-------------------|-------|
| Sensitivity analysis (44 SNPs, $r^2 < 0.3$ ) |                   |       |
| mRS (3–6 vs. 0–2; adjusted NIHSS)            |                   |       |
| IVW (P for Cochran's Q=0.92)                 | 0.06 (0.01–0.76)  | 0.029 |
| MR-RAPS                                      | 0.04 (0.00–0.93)  | 0.045 |
| Weighted median                              | 0.08 (0.00–3.61)  | 0.196 |
| MR-Egger (P for intercept=0.80)              | 0.04 (0.00–5.29)  | 0.191 |
| Ordinal mRS (adjusted NIHSS)                 |                   |       |
| IVW (P for Cochran's Q=0.29)                 | 0.11 (0.02–0.69)  | 0.018 |
| MR-RAPS                                      | 0.10 (0.01–0.91)  | 0.041 |
| Weighted median                              | 0.07 (0.00–1.08)  | 0.057 |
| MR-Egger (P for intercept=0.73)              | 0.20 (0.00–9.62)  | 0.416 |
| Sensitivity analysis (25 SNPs, $r^2 < 0.1$ ) |                   |       |
| mRS (3–6 vs. 0–2; adjusted NIHSS)            |                   |       |
| IVW (P for Cochran's Q=0.76)                 | 0.06 (0.00–1.14)  | 0.061 |
| MR-RAPS                                      | 0.04 (0.00–1.42)  | 0.077 |
| Weighted median                              | 0.07 (0.00–6.81)  | 0.26  |
| MR-Egger (P for intercept=0.61)              | 0.01 (0.00–5.92)  | 0.167 |
| Ordinal mRS (adjusted NIHSS)                 |                   |       |
| IVW (P for Cochran's Q=0.40)                 | 0.10 (0.01–0.91)  | 0.041 |
| MR-RAPS                                      | 0.10 (0.01–1.43)  | 0.090 |
| Weighted median                              | 0.06 (0.00–1.48)  | 0.085 |
| MR-Egger (P for intercept=0.67)              | 0.24 (0.00–23.08) | 0.542 |

AMPK, AMP-activated protein kinase; GWAS, genome-wide association study; NIHSS, National Institutes of Health Stroke Scale; OR, odds ratio; CI, confidence interval; SNPs, single nucleotide polymorphisms; mRS, modified Rankin Scale score; IVW, inverse-variance weighted; MR-RAPS, Mendelian randomization–robust adjusted profile score.
